# Supplementary material
Source: ML conference proceedings conference paper supplement (https://openreview.net/forum?id=QYjO70ACDK)

Source image

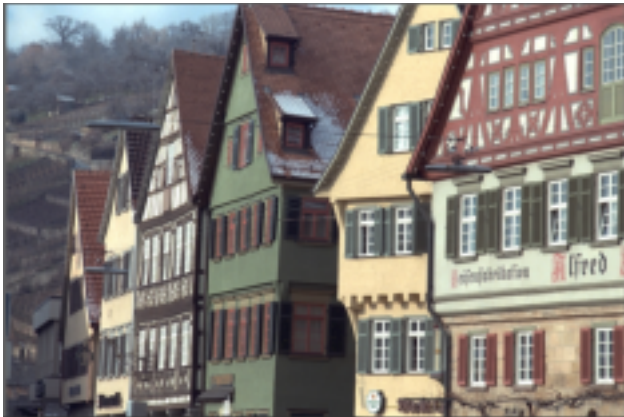

DSW

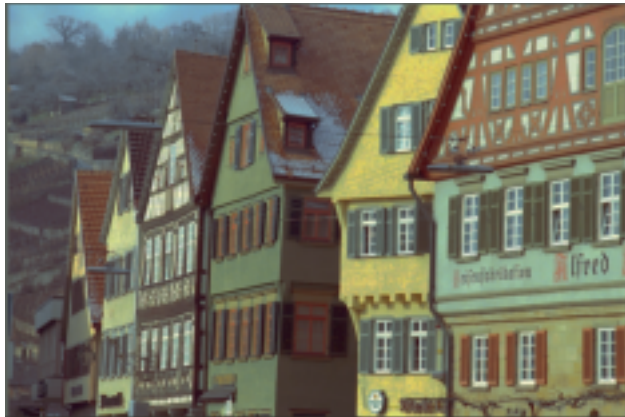

Max-SW

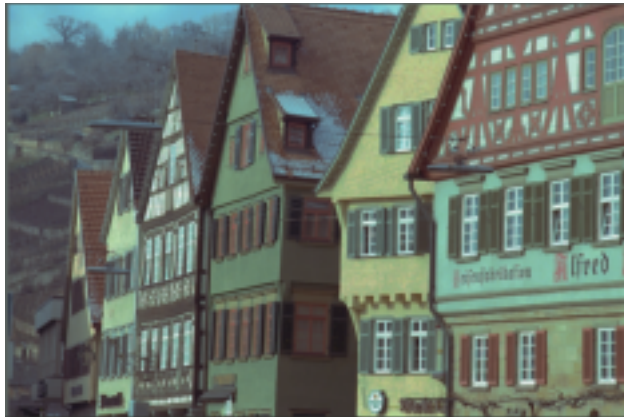

SW

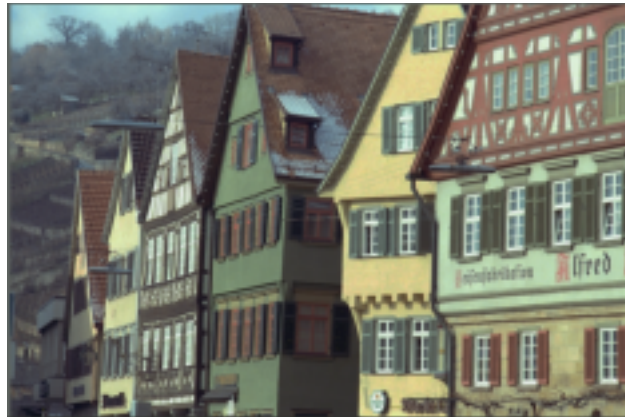

Target image

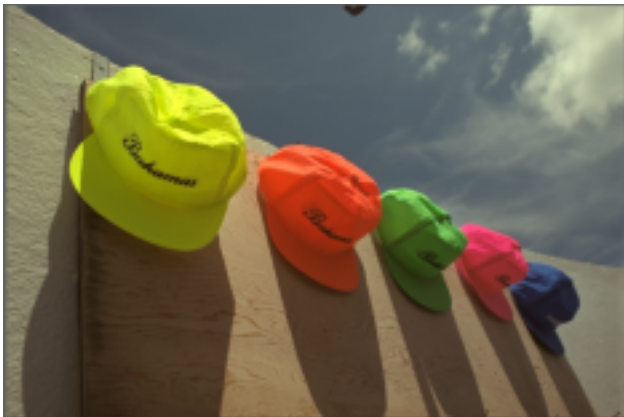

EMD

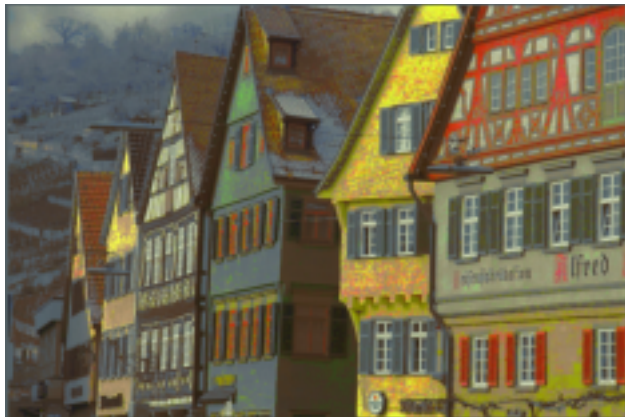

PPMM(SAVE)

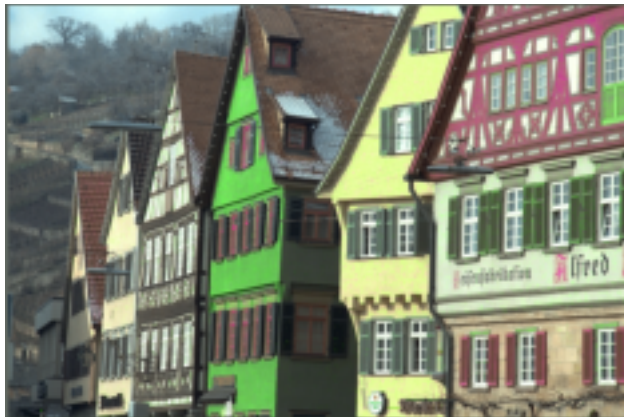

PPMM(DR)

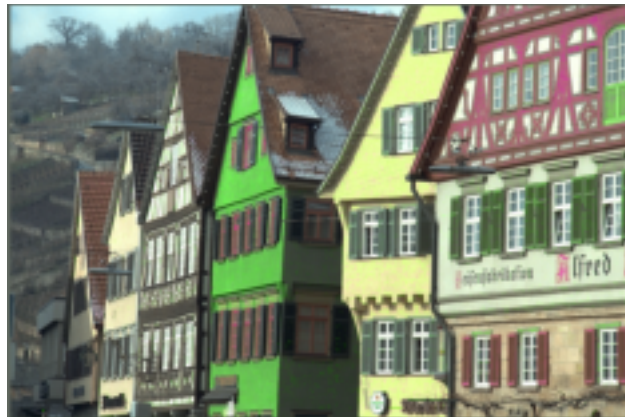

Supplement: supplementary_material [file attachment]
